# Supplementary material
Source: Copernicus journal article supplement (doi:10.5194/egusphere-2026-3149)
Supplement: Supplementary file 1 [file egusphere-2026-3149-supplement.pdf]

1  
2  
3  
4  
5  
6  
7  
8  
9  
10  
11  
12  
13  
14  
15  
16  
17  
18  
19

## Supporting Information for

### **Simulating a long-range transported extreme dust storm over East Asia using a global variable-resolution model (iAMAS v2.6.3): model configuration and impacts of mesh refinement**

Yibo Xue<sup>1</sup>, Chun Zhao<sup>1,2,3,4,5</sup>, Jiawang Feng<sup>1</sup>, Xin Qu<sup>1</sup>, Zihan Xia<sup>1</sup>, Zining Yang<sup>1</sup>, Xiaoxiao Zhang<sup>6</sup>, Qike Yang<sup>1</sup>, Gudongze Li<sup>1</sup>, Ziyu Zhang<sup>1</sup>, Jianxi Zhang<sup>1</sup>

<sup>1</sup>*School of Earth and Space Sciences, University of Science and Technology of China, Hefei, China*

<sup>2</sup>*Joint Laboratory of Fengyun Remote Sensing, University of Science and Technology of China, Hefei, China*

<sup>3</sup>*State Key Laboratory of Fire Science, University of Science and Technology of China, Hefei, China*

<sup>4</sup>*Institute of Advanced Interdisciplinary Research on High-Performance Computing Systems and Software, University of Science and Technology of China, Hefei, China*

<sup>5</sup>*Laoshan Laboratory, Qingdao, China*

<sup>6</sup>*State Key Laboratory of Ecological Safety and Sustainable Development in Arid Lands, Xinjiang Institute of Ecology and Geography, Chinese Academy of Sciences, Urumqi, China*

20 **Table S1.** Daily dust emissions (Tg) over selected regions during 13–17 March 2021.

| Mesh        | Day | EA      | TKD    | MGD     | HC–WIM | LP    |
|-------------|-----|---------|--------|---------|--------|-------|
| U50 km (Tg) | 13  | 82.587  | 33.757 | 22.301  | 8.582  | 0.494 |
|             | 14  | 118.788 | 22.510 | 69.978  | 8.755  | 0.020 |
|             | 15  | 35.000  | 8.212  | 13.102  | 6.111  | 0.124 |
|             | 16  | 38.051  | 4.404  | 14.747  | 1.125  | 0.051 |
|             | 17  | 48.399  | 3.518  | 20.713  | 9.187  | 0.936 |
| V16 km (Tg) | 13  | 109.180 | 39.681 | 30.186  | 7.994  | 0.527 |
|             | 14  | 134.261 | 21.192 | 84.454  | 14.076 | 0.146 |
|             | 15  | 57.832  | 16.747 | 17.309  | 7.327  | 0.480 |
|             | 16  | 58.400  | 8.413  | 26.916  | 2.532  | 0.118 |
|             | 17  | 76.930  | 15.988 | 35.250  | 12.568 | 0.640 |
| V4 km (Tg)  | 13  | 102.692 | 31.067 | 32.622  | 7.625  | 0.626 |
|             | 14  | 163.987 | 20.202 | 102.158 | 17.442 | 0.337 |
|             | 15  | 72.098  | 16.133 | 26.706  | 7.810  | 0.497 |
|             | 16  | 63.529  | 13.848 | 27.044  | 2.453  | 0.131 |
|             | 17  | 97.995  | 24.162 | 44.390  | 16.842 | 1.051 |

22 **Table S2.** Regional mean surface PM<sub>10</sub> concentrations over the YRD during 13–17 March  
23 2021 for different mesh configurations.

| Experiment | Surface PM <sub>10</sub> (μg m <sup>-3</sup> ) | Relative change relative to U50 km (%) |
|------------|------------------------------------------------|----------------------------------------|
| U50 km     | 18.667                                         | -                                      |
| V16 km     | 43.437                                         | +132.70                                |
| V4 km      | 13.481                                         | -27.78                                 |

24

25 **Table S3.** Regional mean dust wet scavenging rate and total dust wet scavenging during  
26 13–17 March 2021 in the V16 km simulation.

| Region | V16 km dust wet scavenging rate<br>(mg m <sup>-2</sup> day <sup>-1</sup> ) | V16 km total dust wet scavenging<br>(Tg) |
|--------|----------------------------------------------------------------------------|------------------------------------------|
| TKD    | 149.594                                                                    | 0.689                                    |
| MGD    | 2.597                                                                      | 0.011                                    |
| HC–WIM | 54.389                                                                     | 0.164                                    |
| LP     | 0.412                                                                      | 0.001                                    |
| NCP    | 10.567                                                                     | 0.022                                    |
| YRD    | 10.865                                                                     | 0.015                                    |

27

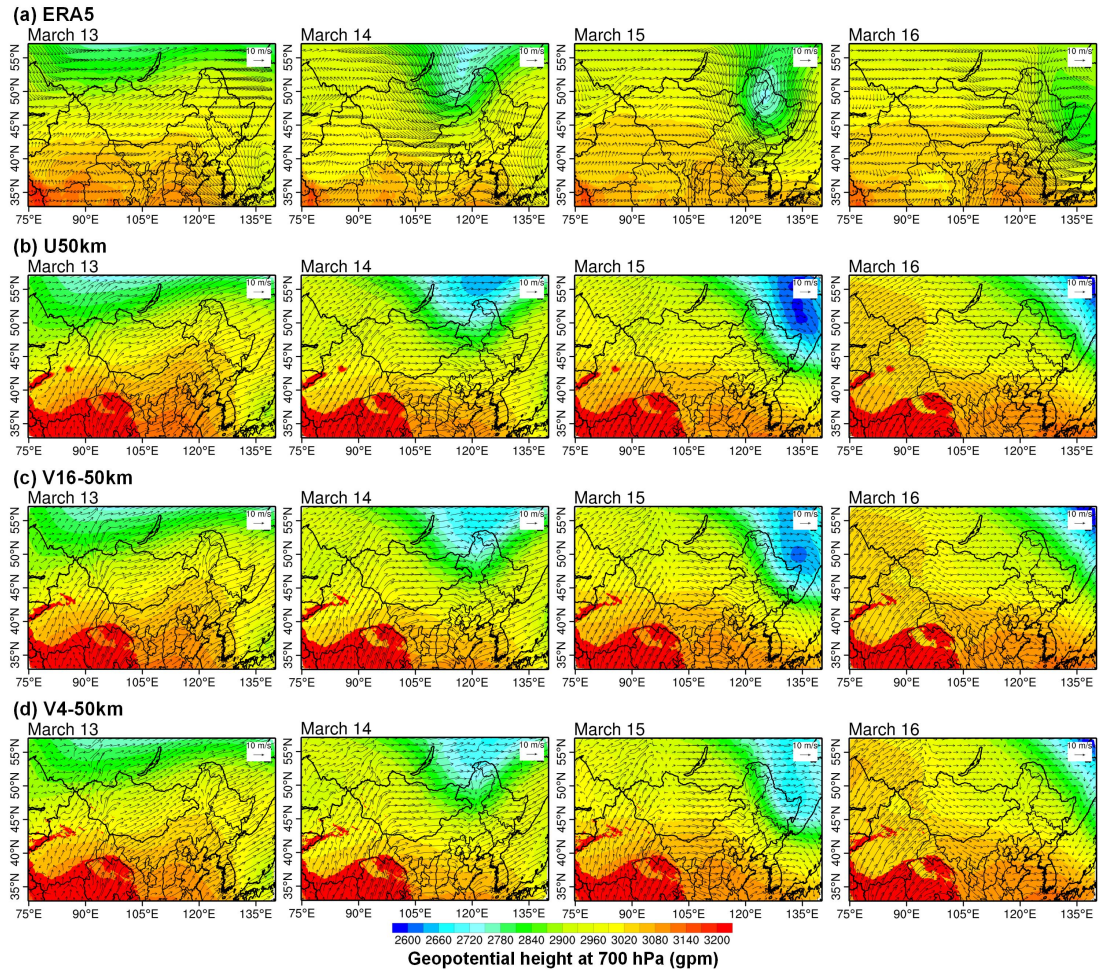

28

29 **Fig. S1.** Daily mean geopotential height at 700 hPa (shading, gpm) and 700 hPa wind vectors  
 30 for ERA5 and iAMAS simulations (U50 km, V16 km, and V4 km) during 13–16 March 2021.

31

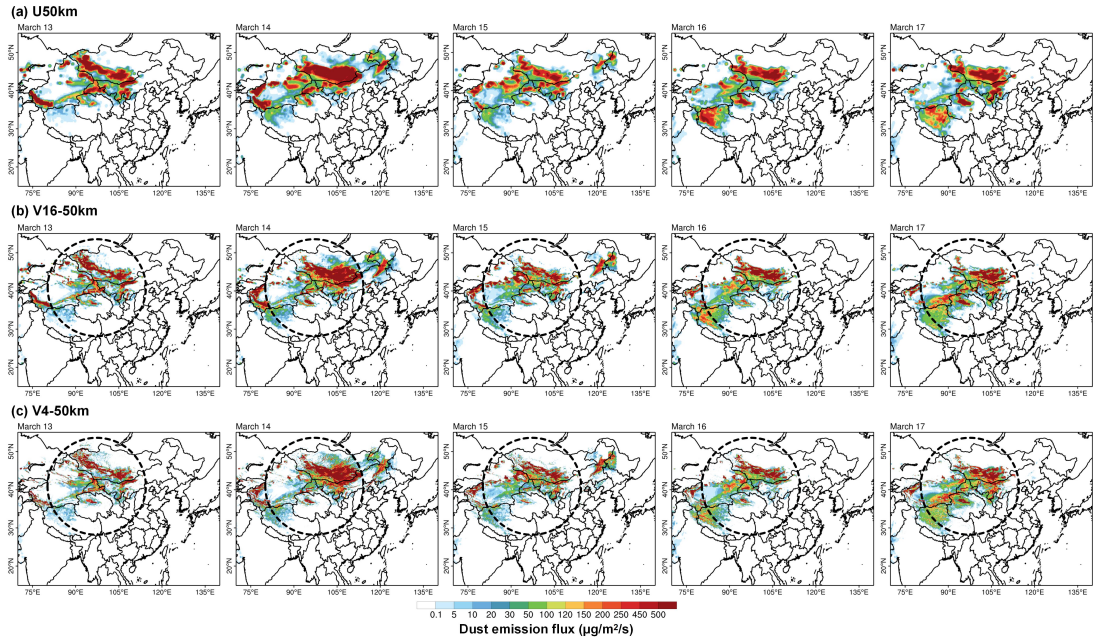

32

33 **Fig. S2.** Daily dust emission flux ( $\mu\text{g m}^{-2} \text{s}^{-1}$ ) from the U50 km, V16 km, and V4 km  
 34 simulations in iAMAS during 13–17 March 2021. The dashed outline denotes the refinement  
 35 region.

36

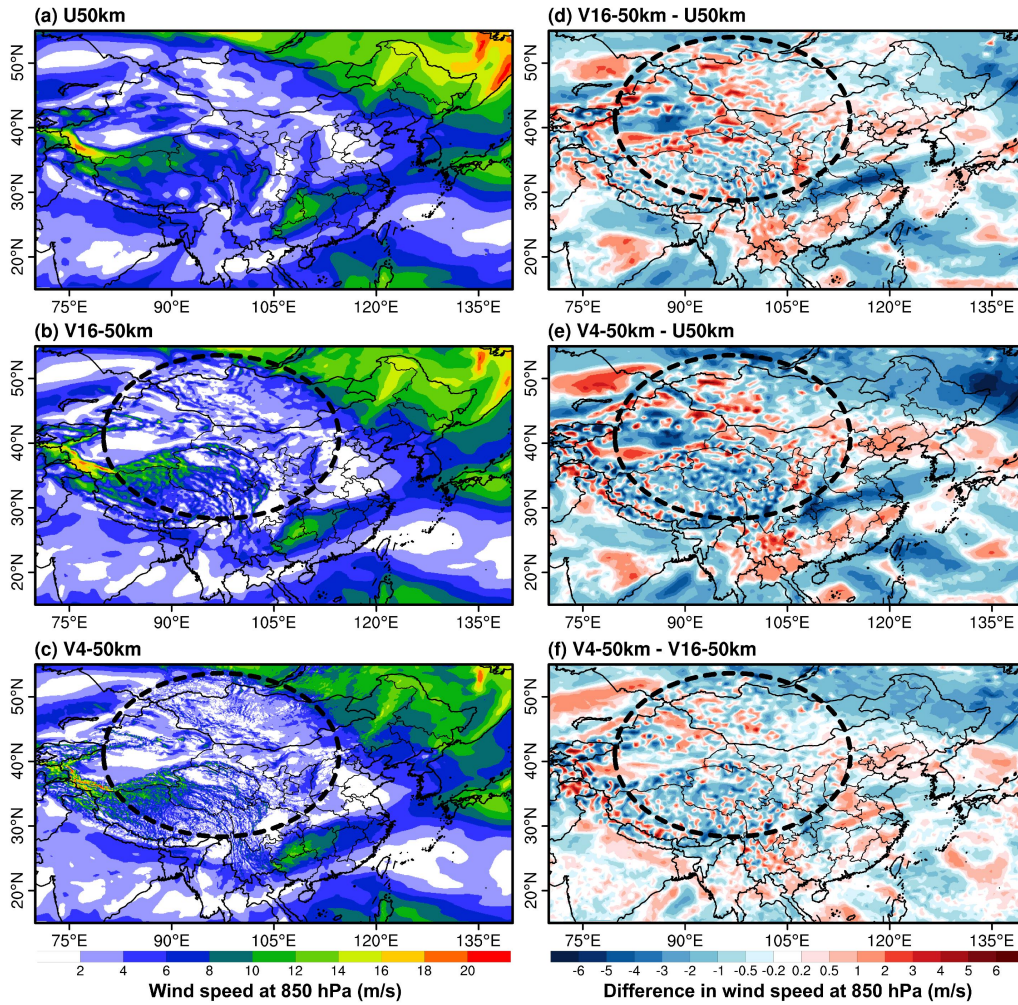

37

38 **Fig. S3.** (a–c) Spatial distribution of period-mean wind speed at 850 hPa ( $\text{m s}^{-1}$ ) from the U50  
 39 km, V16 km, and V4 km simulations during 13–17 March 2021. (d) Differences in 850 hPa  
 40 wind speed between V16 km and U50 km. (e) Differences between V4 km and U50 km. (f)  
 41 Differences between V4 km and V16 km. The dashed outline denotes the refinement region.  
 42

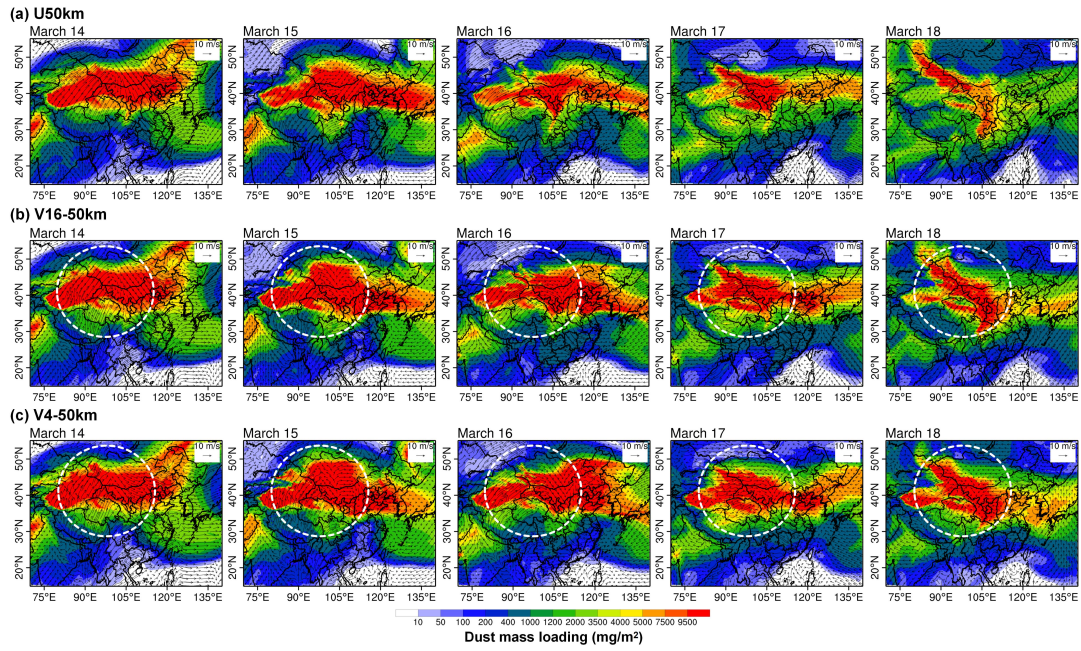

43  
44  
45  
46  
47

**Fig. S4.** Daily dust mass loading ( $\text{mg m}^{-2}$ ) simulated by iAMAS for 14–18 March 2021 using the U50 km, V16 km, and V4 km mesh configurations, with 850 hPa wind vectors overlaid. The dashed outline denotes the refinement region.
